# Supplementary material for: Assessment of the Feasibility of Using Noninvasive Wearable Biometric Monitoring Sensors to Detect Influenza and the Common Cold Before Symptom Onset
Source: PubMed Central journal article supplement (PMC8482058; doi:10.1001/jamanetworkopen.2021.28534), 2021-09-29
Supplement: jamanetwopen-e2128534-s001.pdf [file jamanetwopen-e2128534-s001.pdf]

## Supplementary Online Content

Grzesiak E, Bent B, McClain MT, et al. Assessment of the feasibility of using noninvasive wearable biometric monitoring sensors to detect influenza and the common cold before symptom onset. *JAMA Netw Open*. 2021;4(9):e2128534. doi:10.1001/jamanetworkopen.2021.28534

**eTable 1.** Features Used in Random Forest Models

**eFigure 1.** Feature Sets for Every Model

**eFigure 2.** Confusion Matrices for Best Performing Model Across Viral Challenges and Infection Status Comparisons

**eFigure 3.** Confusion Matrices for Best Performing Model Across Viral Challenges and Infection Severity Comparisons

**eFigure 4.** Relative Feature Importance for Best Performing Model for Each Viral Challenge, Infection Status Grouping, and Infection Severity Grouping

**eTable 2.** Racial Demographics, Sex, and Median Age Across Infection Severity Groups for H1N1 Influenza Viral Challenge and Rhinovirus Viral Challenge

**eTable 3.** Mean Accuracy, Precision, Sensitivity, F1-Score, AUC of Every Infection Status Model Tested Across Viral Challenges, Number of Hours Post-Inoculation, and Infection Severity Comparisons

**eTable 4.** Mean Accuracy, Precision, Sensitivity, Specificity, F1-Score, AUC of Every Infection Severity Model Tested Across Individual Viral Challenges, Number of Hours Post-Inoculation, and Infection Severity Comparisons

**eTable 5.** Mean Accuracy, Precision, Sensitivity, Specificity, F1-Score, AUC of Every Infection Severity Model Tested Across Combined Viral Challenges, Number of Hours Post-Inoculation, and Infection Severity Comparisons

This supplementary material has been provided by the authors to give readers additional information about their work.

| Feature Name | Sensor    | Definition                                                                          | Calculation                                                      | Final Feature                                                                           |
|--------------|-----------|-------------------------------------------------------------------------------------|------------------------------------------------------------------|-----------------------------------------------------------------------------------------|
| Median RHR   | HR, ACC   | Median Resting Heart Rate                                                           | HR when: 5 min weighted rolling ACC window < resting threshold   | median(RHR) - median(RHR) <sub>baseline</sub>                                           |
| Median rTemp | Temp, ACC | Median Resting Temperature                                                          | Temp when: 5 min weighted rolling ACC window < resting threshold | median(rTemp) - median(rTemp) <sub>baseline</sub>                                       |
| Median ACC   | ACC       | Median Root Mean Squared 3-axis Accelerometer                                       | $\text{sqrt}[\text{ACC}_x^2 + \text{ACC}_y^2 + \text{ACC}_z^2]$  | median(ACC) - median(ACC) <sub>baseline</sub>                                           |
| Mean HRV     | IBI       | Mean Heart Rate Variability                                                         | mean(RR)                                                         | mean(rolling 5 min mean HRV) - mean(rolling 5 min mean HRV) <sub>baseline</sub>         |
| Median HRV   |           | Median Heart Rate Variability                                                       | median(RR)                                                       | mean(rolling 5 min median HRV) - mean(rolling 5 min median HRV) <sub>baseline</sub>     |
| rMSSD        |           | Root Mean Square of Successive RR Interval Differences                              | $\text{sqrt}[\text{mean}((\text{RR}_{i+1} - \text{RR}_i)^2)]$    | mean(rolling 5 min rMSSD) - mean(rolling 5 min rMSSD) <sub>baseline</sub>               |
| NN50         |           | Number of Successive RR (w/ Filtering, NN) Intervals That Differ by More Than 50 ms | $\text{sum}[ \text{RR}_{i+1} - \text{RR}_i  > 50 \text{ ms}]$    | mean(rolling 5 min NN50) - mean(rolling 5 min NN50) <sub>baseline</sub>                 |
| pNN50        |           | % of NN Intervals That Differ by More Than 50 ms                                    | $(\text{NN50} \times 100) / N$                                   | mean(rolling 5 min median pNN50) - mean(rolling 5 min median pNN50) <sub>baseline</sub> |
| SDNN         |           | Standard Deviation of NN Intervals                                                  | std[NN50]                                                        | mean(rolling 5 min median SDNN) - mean(rolling 5 min median SDNN) <sub>baseline</sub>   |

**eTable 1.** Features Used in Random Forest Models. Feature names, definitions, sensors they were derived from, and calculations.

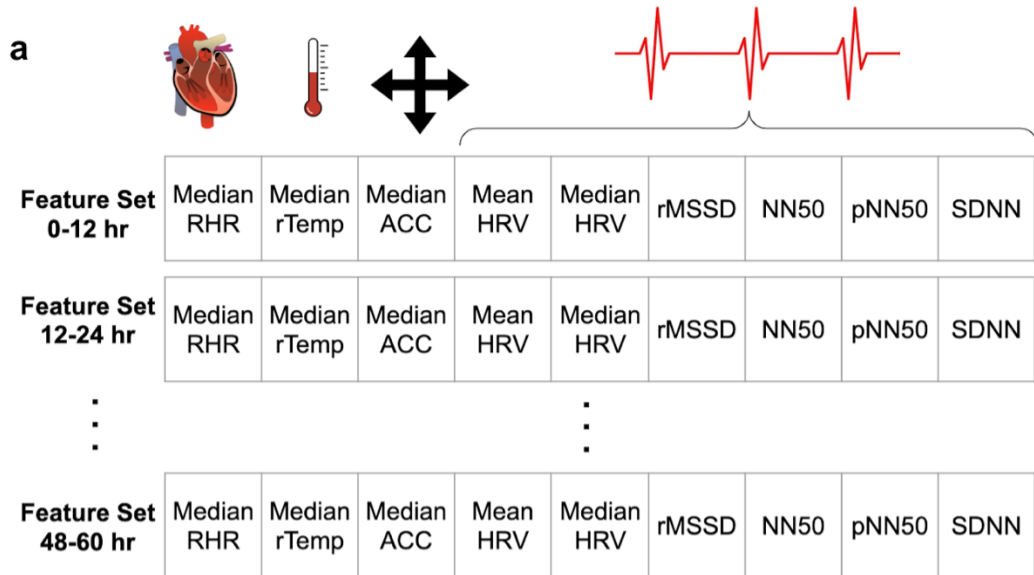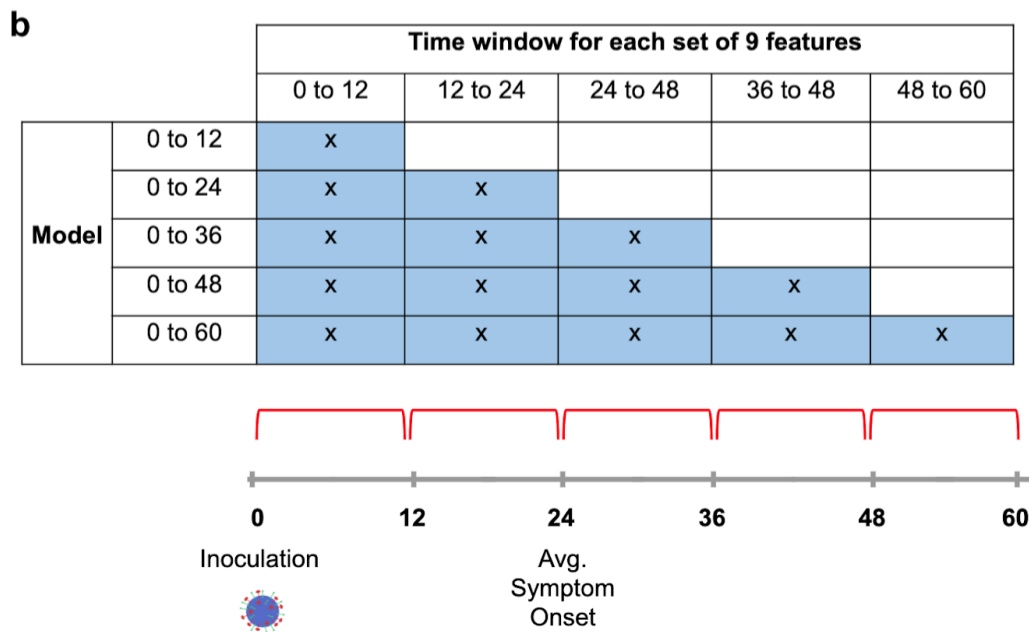

**eFigure 1.** Feature Sets for Every Model. We used the feature set shown in **a** for each model shown in **b**. The same 9 features are calculated per 12 hr window post-inoculation. Feature sets are only included in models that cover the same time periods.

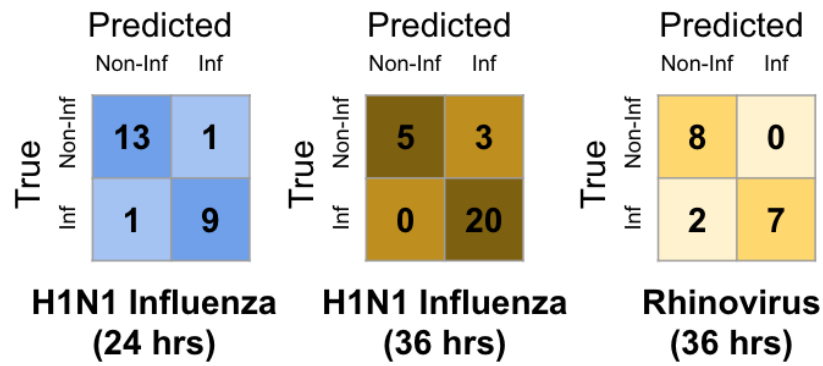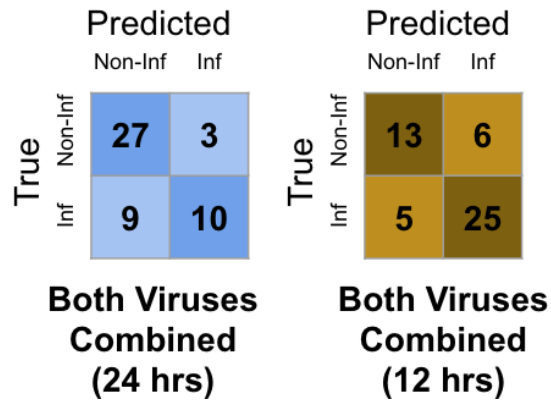

**eFigure 2.** Confusion Matrices for Best Performing Model Across Viral Challenges and Infection Status Comparisons. Number of hours post-inoculation of best performance is noted per matrix.

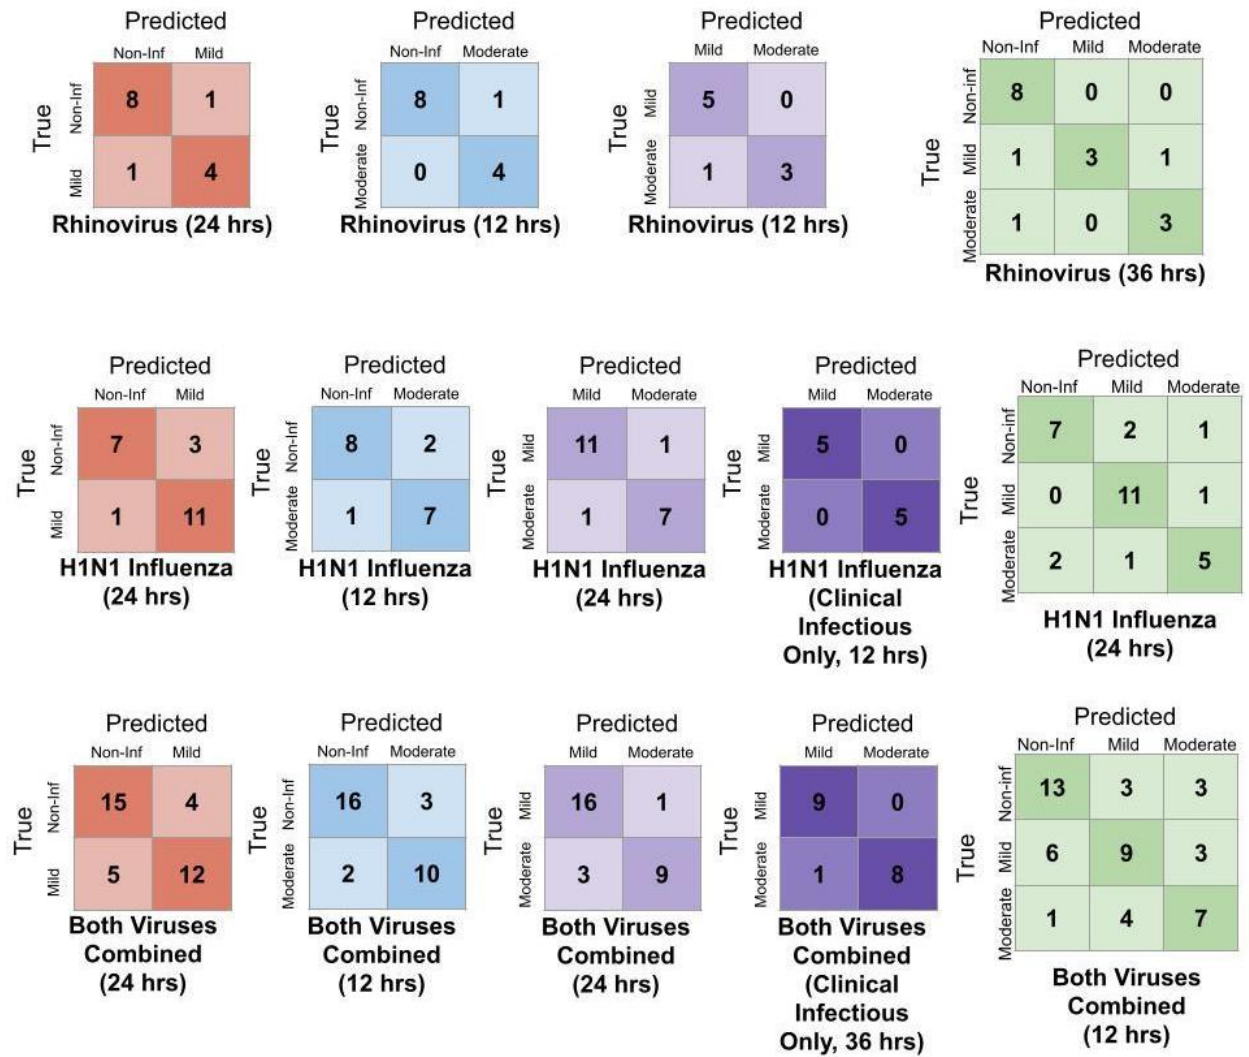

**eFigure 3.** Confusion Matrices for Best Performing Model Across Viral Challenges and Infection Severity Comparisons. Number of hours post-inoculation of best performance is noted per matrix.

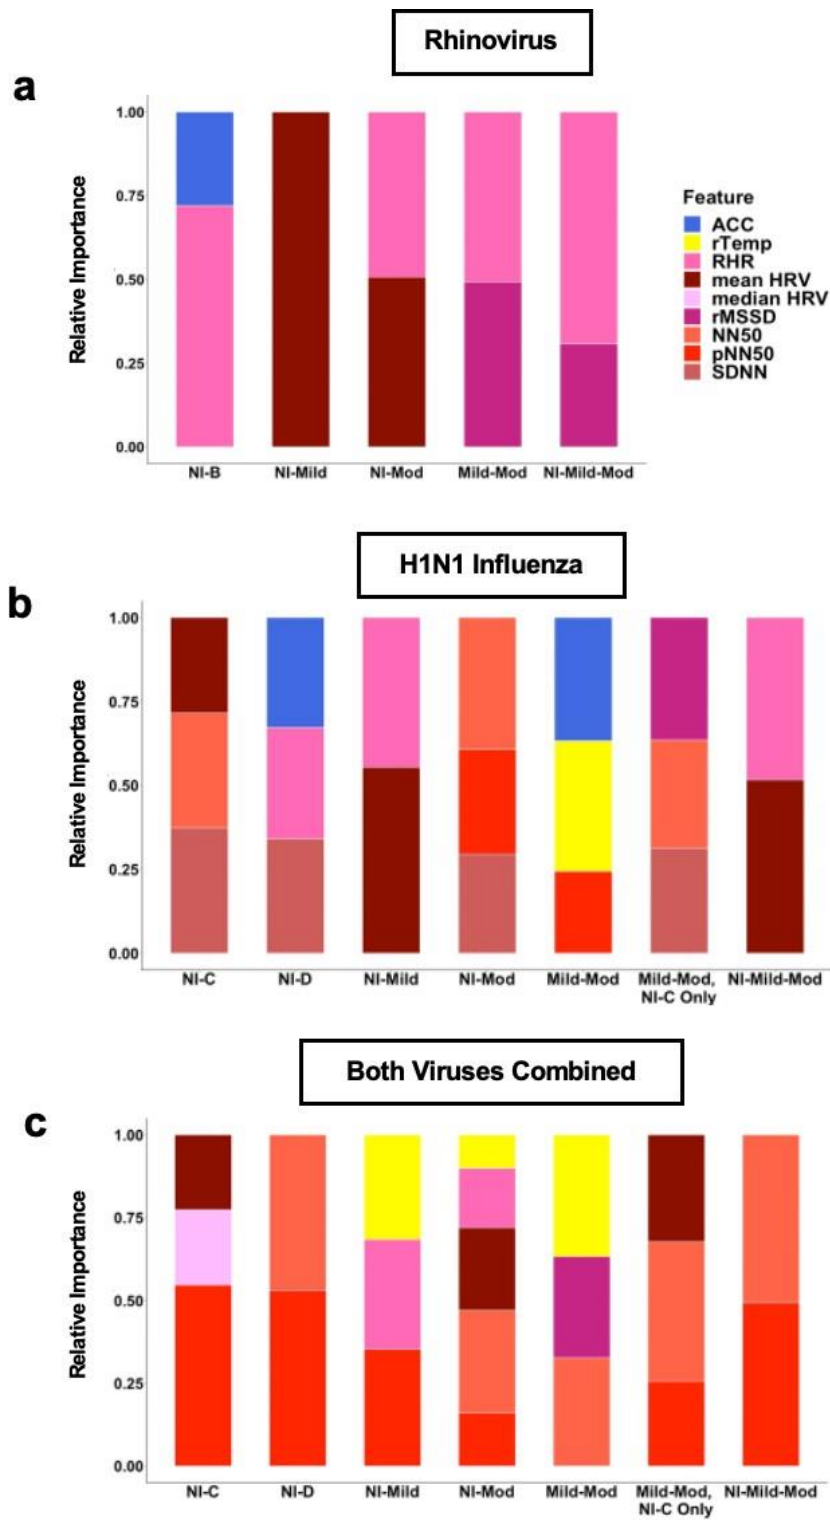

**eFigure 4.** Relative Feature Importance for Best Performing Model for Each Viral Challenge, Infection Status Grouping, and Infection Severity Grouping

**a**

| Influenza          |        | Non-Inf    | Mild       | Moderate   | Total      |
|--------------------|--------|------------|------------|------------|------------|
| Median Age (range) |        | 40 (26-55) | 32 (18-55) | 33 (23-53) | 37 (18-55) |
| Sex (N)            | Male   | 9          | 10         | 8          | 27         |
|                    | Female | 1          | 9          | 2          | 12         |
| Race (N)           | White  | 7          | 11         | 7          | 25         |
|                    | Black  | 0          | 2          | 0          | 2          |
|                    | Asian  | 2          | 3          | 1          | 6          |
|                    | Other  | 1          | 3          | 2          | 6          |

**b**

| Rhinovirus         |        | Non-Inf    | Mild       | Moderate   | Total      |
|--------------------|--------|------------|------------|------------|------------|
| Median Age (range) |        | 21 (20-24) | 20 (20-21) | 22 (21-33) | 21 (20-33) |
| Sex (N)            | Male   | 7          | 3          | 1          | 11         |
|                    | Female | 2          | 2          | 3          | 7          |
| Race (N)           | White  | 7          | 4          | 3          | 14         |
|                    | Black  | 2          | 0          | 0          | 2          |
|                    | Asian  | 0          | 1          | 1          | 2          |

**eTable 2.** Racial Demographics, Sex, and Median Age Across Infection Severity Groups for **a** H1N1 Influenza Viral Challenge and **b** Rhinovirus Viral Challenge.

| Model                          | Time PI | Accuracy [SD] (%) | Precision (%) | Sensitivity (%) | Specificity (%) | F1-Score (%) | AUC [95% CI]      |
|--------------------------------|---------|-------------------|---------------|-----------------|-----------------|--------------|-------------------|
| flu-infected, clinical         | 0-12    | 79 [41]           | 72            | 80              | 79              | 76           | 0.68 [0.46, 0.89] |
| flu-infected, data-driven      | 0-12    | 77 [42]           | 79            | 90              | 50              | 84           | 0.62 [0.41, 0.84] |
| RV-infected, both              | 0-12    | 78 [42]           | 78            | 78              | 78              | 78           | 0.77 [0.54, 0.99] |
| combined-infected, data-driven | 0-12    | 78 [41]           | 81            | 83              | 68              | 82           | 0.66 [0.50, 0.82] |
| combined-infected, clinical    | 0-12    | 69 [46]           | 69            | 58              | 78              | 63           | 0.55 [0.37, 0.73] |
| flu-infected, clinical         | 0-24    | 92 [27]           | 90            | 90              | 93              | 90           | 0.85 [0.70, 1.00] |
| flu-infected, data-driven      | 0-24    | 83 [37]           | 86            | 90              | 70              | 88           | 0.82 [0.64, 0.99] |
| RV-infected, both              | 0-24    | 78 [42]           | 78            | 78              | 78              | 78           | 0.77 [0.54, 0.99] |
| combined-infected, data-driven | 0-24    | 78 [41]           | 81            | 83              | 68              | 82           | 0.66 [0.50, 0.82] |
| combined-infected, clinical    | 0-24    | 76 [43]           | 76            | 68              | 83              | 72           | 0.75 [0.60, 0.90] |
| flu-infected, clinical         | 0-36    | 92 [27]           | 90            | 90              | 93              | 90           | 0.85 [0.70, 1.00] |
| flu-infected, data-driven      | 0-36    | 89 [31]           | 87            | 100             | 63              | 93           | 0.84 [0.66, 1.00] |
| RV-infected, both              | 0-36    | 88 [32]           | 100           | 78              | 100             | 88           | 0.96 [0.85, 1.00] |
| combined-infected, data-driven | 0-36    | 78 [41]           | 81            | 83              | 68              | 82           | 0.66 [0.50, 0.82] |
| combined-infected, clinical    | 0-36    | 76 [43]           | 76            | 68              | 83              | 72           | 0.75 [0.60, 0.90] |

**eTable 3.** Mean Accuracy, Precision, Sensitivity, F1-Score, AUC of Every Infection Status Model Tested Across Viral Challenges, Number of Hours Post-Inoculation, and Infection Severity Comparisons



| Model                                      | Time PI | Accuracy [SD] (%) | Precision (%) | Sensitivity (%) | Specificity (%) | F1-Score | AUC [95% CI]      |
|--------------------------------------------|---------|-------------------|---------------|-----------------|-----------------|----------|-------------------|
| flu-asymptomatic-mild                      | 0-12    | 70 [46]           | 75            | 69              | 70              | 72       | 0.72 [0.51, 0.94] |
| flu-asymptomatic-moderate                  | 0-12    | 83 [37]           | 78            | 88              | 80              | 82       | 0.88 [0.71, 1.00] |
| flu-mild-moderate                          | 0-12    | 81 [39]           | 75            | 75              | 85              | 75       | 0.86 [0.69, 1.00] |
| flu-mild-moderate (Infected Clinical Only) | 0-12    | 100 [0]           | 100           | 100             | 100             | 100      | 1.00 [1.00, 1.00] |
| flu-asymptomatic-mild-moderate             | 0-12    | 52 [50]           | 53            | 52              | 75              | 52       | --                |
| RV-asymptomatic-mild                       | 0-12    | 71 [45]           | 80            | 71              | 100             | 65       | 0.33 [0.02, 0.65] |
| RV-asymptomatic-moderate                   | 0-12    | 92 [27]           | 80            | 100             | 89              | 89       | 1.00 [1.00, 1.00] |
| RV-mild-moderate                           | 0-12    | 89 [31]           | 100           | 75              | 100             | 86       | 0.95 [0.79, 1.00] |
| RV-asymptomatic-mild-moderate              | 0-12    | 67 [47]           | 66            | 67              | 77              | 66       | --                |
| flu-asymptomatic-mild                      | 0-24    | 82 [39]           | 79            | 92              | 70              | 85       | 0.75 [0.53, 0.96] |
| flu-asymptomatic-moderate                  | 0-24    | 83 [37]           | 78            | 88              | 80              | 82       | 0.88 [0.71, 1.00] |
| flu-mild-moderate                          | 0-24    | 90 [30]           | 88            | 88              | 92              | 88       | 0.88 [0.72, 1.00] |
| flu-asymptomatic-mild-moderate             | 0-24    | 77 [42]           | 76            | 77              | 88              | 76       | --                |
| RV-asymptomatic-mild                       | 0-24    | 86 [35]           | 80            | 80              | 89              | 80       | 0.71 [0.43, 0.99] |
| RV-asymptomatic-moderate                   | 0-24    | 92 [27]           | 80            | 100             | 89              | 89       | 1.00 [1.00, 1.00] |
| RV-mild-moderate                           | 0-24    | 89 [31]           | 1             | 75              | 100             | 86       | 0.95 [0.79, 1.00] |
| RV-asymptomatic-mild-moderate              | 0-24    | 67 [47]           | 66            | 67              | 77              | 66       | --                |
| RV-asymptomatic-mild-moderate              | 0-36    | 82 [38]           | 85            | 82              | 88              | 82       | --                |

**eTable 4.** Mean Accuracy, Precision, Sensitivity, Specificity, F1-Score, AUC of Every Infection Severity Model Tested Across Individual Viral Challenges, Number of Hours Post-Inoculation, and Infection Severity Comparisons

| Model                                           | Time PI | Accuracy [SD] (%) | Precision (%) | Sensitivity (%) | Specificity (%) | F1-Score | AUC [95% CI]      |
|-------------------------------------------------|---------|-------------------|---------------|-----------------|-----------------|----------|-------------------|
| combined-asymptomatic-mild                      | 0-12    | 62 [49]           | 61            | 61              | 63              | 61       | 0.64 [0.46, 0.82] |
| combined -asymptomatic-moderate                 | 0-12    | 84 [37]           | 77            | 83              | 84              | 80       | 0.78 [0.61, 0.94] |
| combined-mild-moderate                          | 0-12    | 70 [46]           | 67            | 50              | 83              | 57       | 0.65 [0.45, 0.85] |
| combined-mild-moderate (Infected Clinical Only) | 0-12    | 79 [41]           | 72            | 89              | 70              | 80       | 0.76 [0.53, 0.98] |
| combined-asymptomatic-mild-moderate             | 0-12    | 59 [49]           | 59            | 59              | 79              | 59       | --                |
| combined-asymptomatic-mild                      | 0-24    | 75 [43]           | 71            | 73              | 79              | 70       | 0.70 [0.52, 0.87] |
| combined -asymptomatic-moderate                 | 0-24    | 84 [37]           | 77            | 83              | 84              | 80       | 0.78 [0.61, 0.94] |
| combined-mild-moderate                          | 0-24    | 86 [34]           | 90            | 75              | 94              | 82       | 0.91 [0.80, 1.00] |
| combined-mild-moderate (Infected Clinical Only) | 0-24    | 89 [31]           | 89            | 89              | 89              | 89       | 0.93 [0.79, 1.00] |
| combined-asymptomatic-mild-moderate             | 0-24    | 59 [49]           | 59            | 59              | 79              | 59       | --                |
| combined-asymptomatic-mild                      | 0-36    | 75 [43]           | 71            | 73              | 79              | 70       | 0.70 [0.52, 0.87] |
| combined -asymptomatic-moderate                 | 0-36    | 84 [37]           | 77            | 83              | 84              | 80       | 0.78 [0.61, 0.94] |
| combined-mild-moderate                          | 0-36    | 86 [34]           | 90            | 75              | 94              | 82       | 0.91 [0.80, 1.00] |
| combined-mild-moderate (Infected Clinical Only) | 0-36    | 94 [23]           | 100           | 89              | 100             | 94       | 0.94 [0.82, 1.00] |
| combined-asymptomatic-mild-moderate             | 0-24    | 59 [49]           | 59            | 59              | 79              | 59       | --                |

**eTable 5.** Mean Accuracy, Precision, Sensitivity, Specificity, F1-Score, AUC of Every Infection Severity Model Tested Across Combined Viral Challenges, Number of Hours Post-Inoculation, and Infection Severity Comparisons
